# Supplementary material
Source: PubMed Central journal article supplement (PMC4775125)
Supplement: supp_pp.15.01550_PP2015-01550DR2_Supplemental_Materialfigs.pdf [file supp_pp.15.01550_PP2015-01550DR2_Supplemental_Materialfigs.pdf]

1 SUPPLEMENTAL DATA

2 Supplemental Figure S1

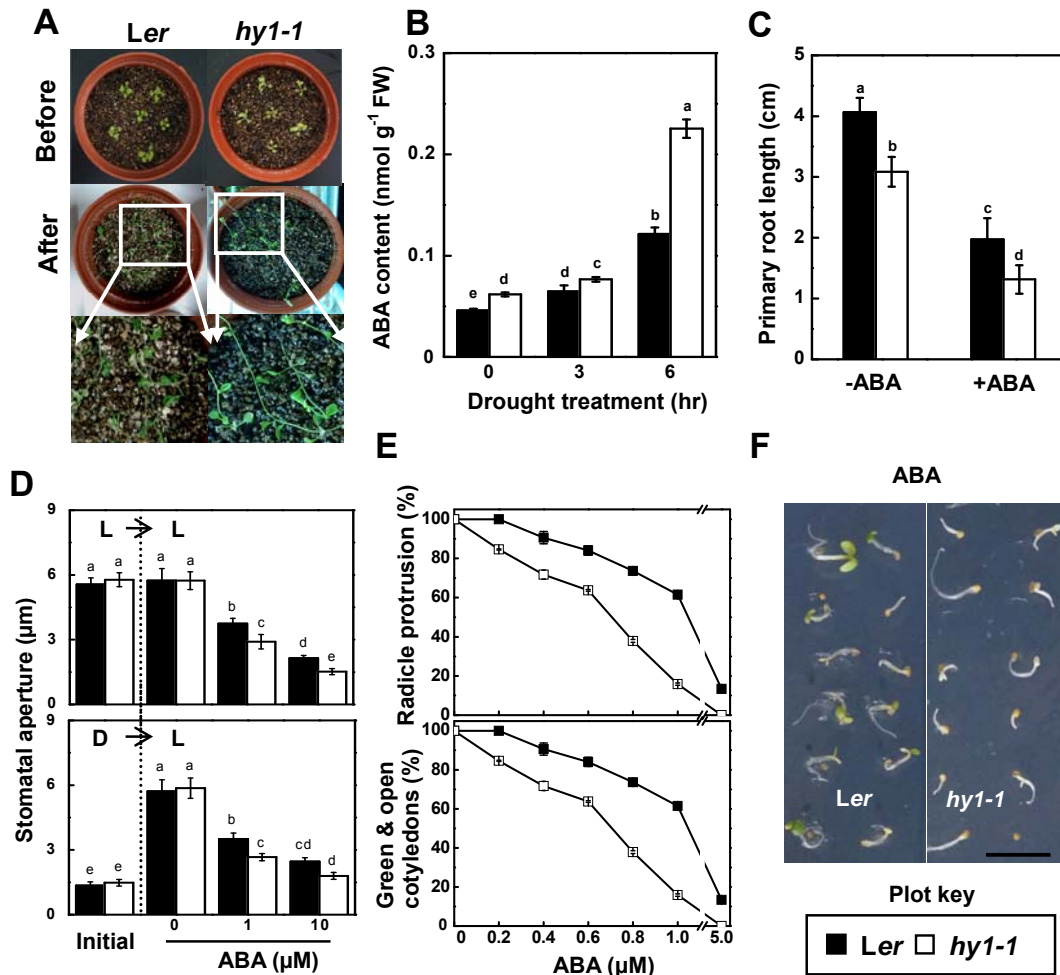

3

4 Supplemental Figure S1. Phenotypes and ABA levels of *hy1-1* mutant in response to

5 drought and ABA treatment. A, 20-day-old plants were cultured in pots before

6 stopping irrigation. The pictures presented illustrate plants at day 0, and at day 15

7 after the application of drought stress. B, ABA contents in 5-day-old seedlings of *Ler*

8 or *hy1-1* mutant in response to drought stress for the indicated time. C, Primary root

9 growth for each genotype 7 days after the transfer to the MS medium with or without

---

10 10  $\mu$ M ABA ( $n = 15$ ). D, ABA-induced stomatal closure (top panel) and inhibition of  
11 stomatal opening (bottom panel), which was measured 2 hr after ABA treatment ( $n =$   
12 50). E, Radicle protrusion and green & open cotyledon rate (%) of each genotype  
13 grown on MS medium containing the indicated ABA concentrations for 3 days or 5  
14 days, respectively ( $n = 50$ ). Pictures were also taken (F; 0.4  $\mu$ M ABA for 5 days, bar =  
15 1 cm). Plot key illustrated the genotypes for each bar shown in B-D. Data are mean  $\pm$   
16 SE from at least three independent experiments. Differences among treatments were  
17 analyzed by one-way ANOVA, taking  $P < 0.05$  level as significant according to  
18 Tukey's multiple range test.  
19

20 **Supplemental Figure S2**

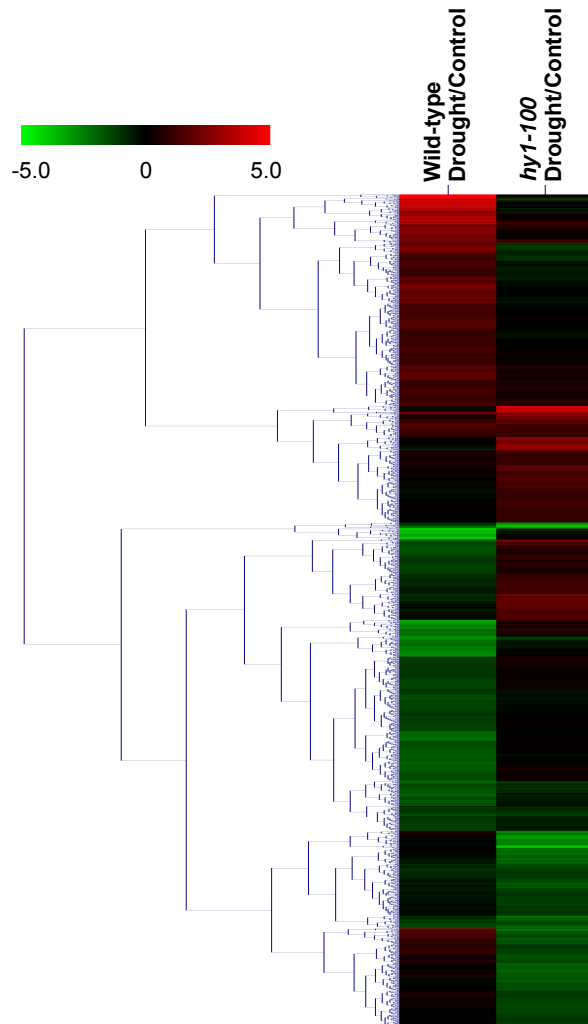

21 **Supplemental Figure S2.** Hierarchical cluster of all differentially expressed genes of  
22 RNA-Seq experiment. Distances were calculated using the Pearson similarity, and  
23 agglomeration was performed according to the Ward's minimum variance algorithm.  
24 The gradation from red to green represents strong up-regulation to strong  
25 down-regulation on a log scale.

26 **Supplemental Figure S3**

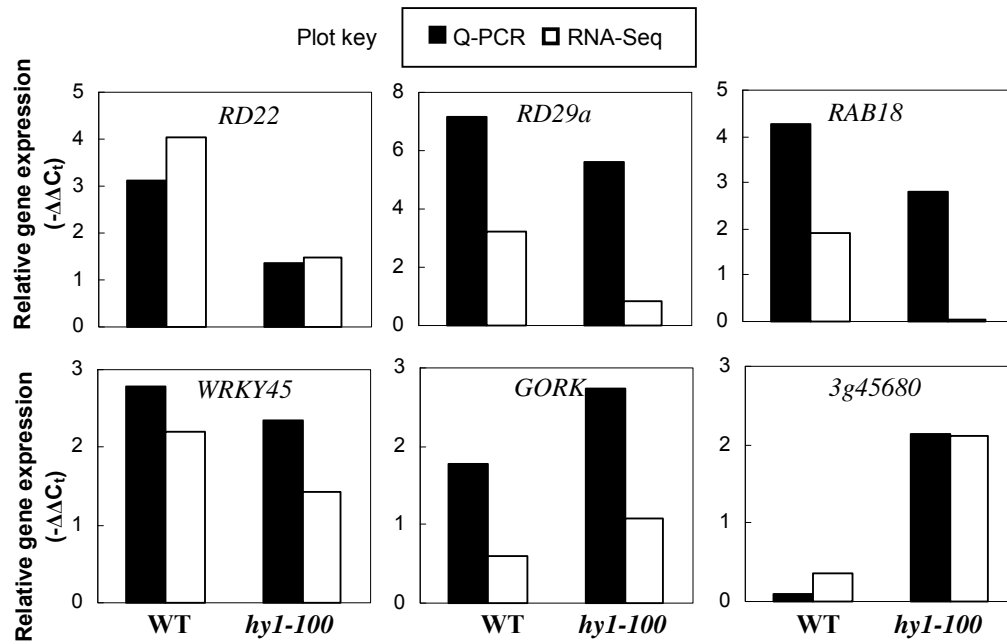

27 **Supplemental Figure S3.** Q-PCR validation for the fold-change of representative  
28 genes of wild-type and *HY1*-loss mutant detached leaves in response to desiccation for  
29 3 hr. Expression of selected genes are presented relative to those of corresponding  
30 samples at 0 hr (100%). Values for Q-PCR are mean  $\pm$  SE of at least three  
31 independent experiments.

---

32 **Supplemental Figure S4**

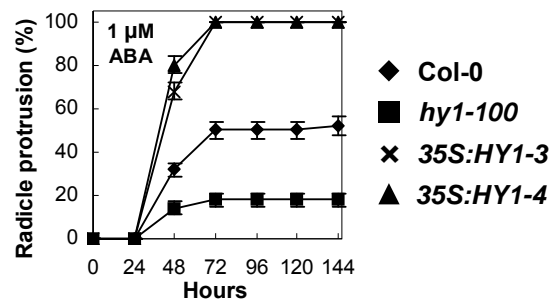

33 **Supplemental Figure S4.** Time course analysis of the radicle protrusion of wild-type,  
34 *HY1* loss- and gain-of-function mutants in response to 1 μM ABA. Data are mean ±  
35 SE of at least three independent experiments ( $n = 50$ ).

36

37 **Supplemental Figure S5**

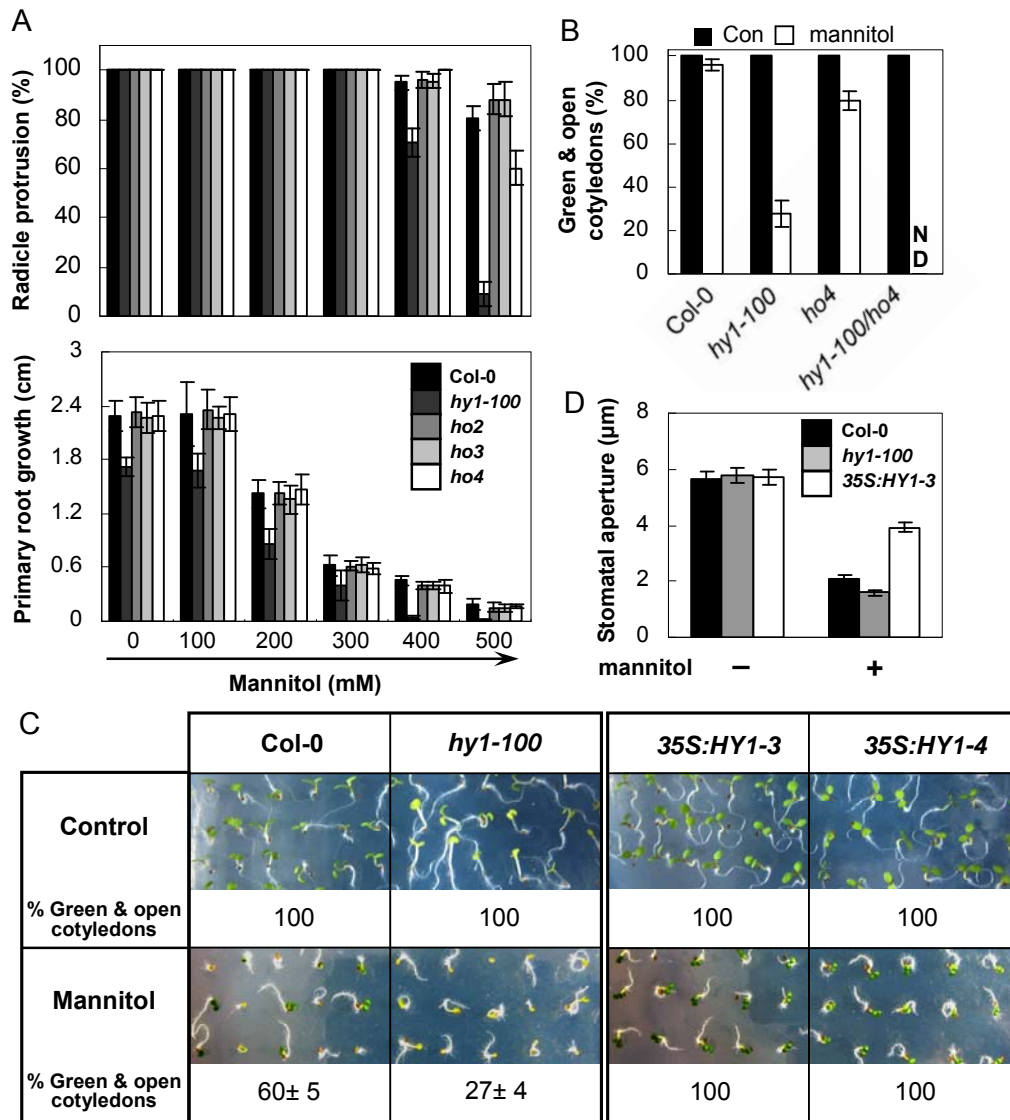

38 **Supplemental Figure S5.** Osmotic phenotypic analyses of wild-type (Col-0),  
 39 *hy1-100*, *ho2*, *ho3*, and *ho4* mutants, *hy1-100/ho4* and *HY1* overexpression lines  
 40 *35S:HY1-3/4*. A, Dose-dependent germination rate and primary root growth inhibition  
 41 in wild-type and each *ho* mutant induced by mannitol with increasing concentrations  
 42 for 5 days ( $n = 50$  or 15). B, Green & open cotyledon rate in wild-type (Col-0),  
 43 *hy1-100*, *ho4*, and *hy1-100/ho4* seedlings with or without 400 mM mannitol for 8

---

44 days ( $n = 50$ ). C, Green & open cotyledon rate in wild-type (Col-0), *hyl-100* and  
45 *35S:HY1-3/1-4* seedlings with or without 400 mM mannitol for 5 days ( $n = 50$ ). D,  
46 Mannitol-induced stomatal closure of the wild-type (Col-0), *hyl-100* and *35S:HY1-3*  
47 mutant plants ( $n = 50$ ). ND, none detected. Data are means  $\pm$  SE from at least three  
48 independent experiments.

49 **Supplemental Figure S6**

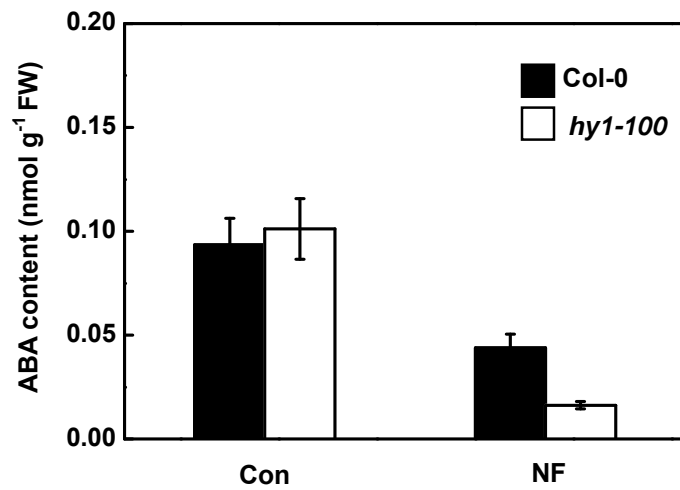

50 **Supplemental Figure S6.** ABA contents in wild-type and *hy1-100* mutant seedlings  
51 treated with or without norflurazon (NF) for 5 days. Seeds were sown on MS medium  
52 with or without norflurazon (5  $\mu$ M), and collected 5 days later for ABA analysis.  
53 Seedlings without NF treatment were regarded as control (Con). Data are mean  $\pm$  SE  
54 from at least three independent experiments.

55



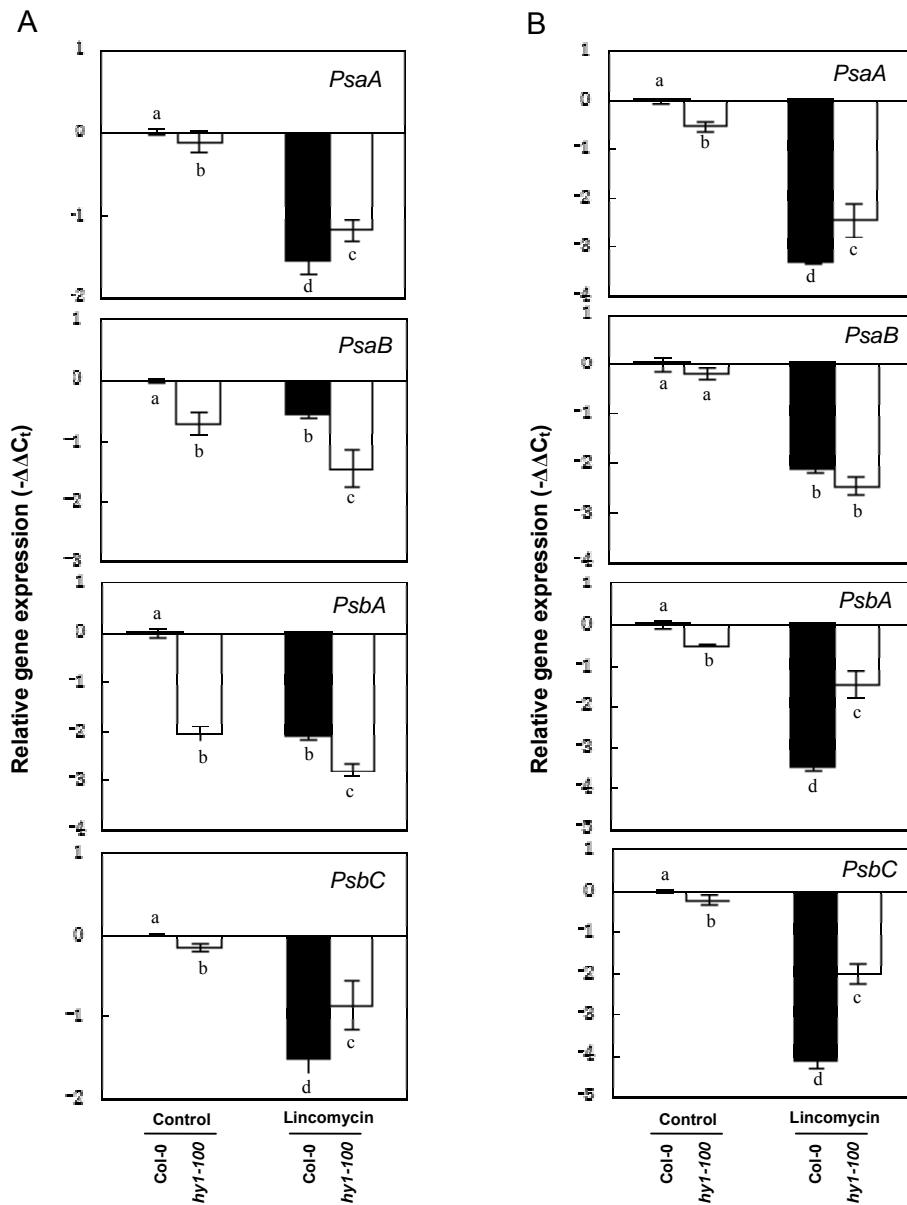

57 **Supplemental Figure S7.** Impact of lincomycin treatments on gene expression in  
 58 seedlings of **wild-type** (black bar) and *hy1-100* (white bar). Related gene included:  
 59 *PSI P700 apoprotein A1 (PsaA, Atcg00350)*, *PSI P700 apoprotein A2 (PsaB,*  
 60 *Atcg00340)*, *Photosystem II protein D1 (PsbA, Atcg00020)*, and *PSII 43 kDa protein*  
 61 *(PsbC, Atcg00280)*. A, Seeds were sown on MS medium with or without 500  $\mu$ M  
 62 lincomycin, and collected 5 d later for Q-PCR analysis. B, 5-day-old seedlings were

---

63 transferred to MS medium with or without 500  $\mu$ M lincomycin, and collected 5 days  
64 later for Q-PCR analysis. Seeds or seedlings without chemical treatments were  
65 regarded as control. Expressions of selected genes are presented relative to  
66 corresponding wild-type control samples. Values are mean  $\pm$  SE of at least three  
67 independent experiments. Differences among treatments were analyzed by one-way  
68 ANOVA, taking  $P < 0.05$  level as significant according to Tukey's multiple range test.

69

70 **Supplemental Figure S8**

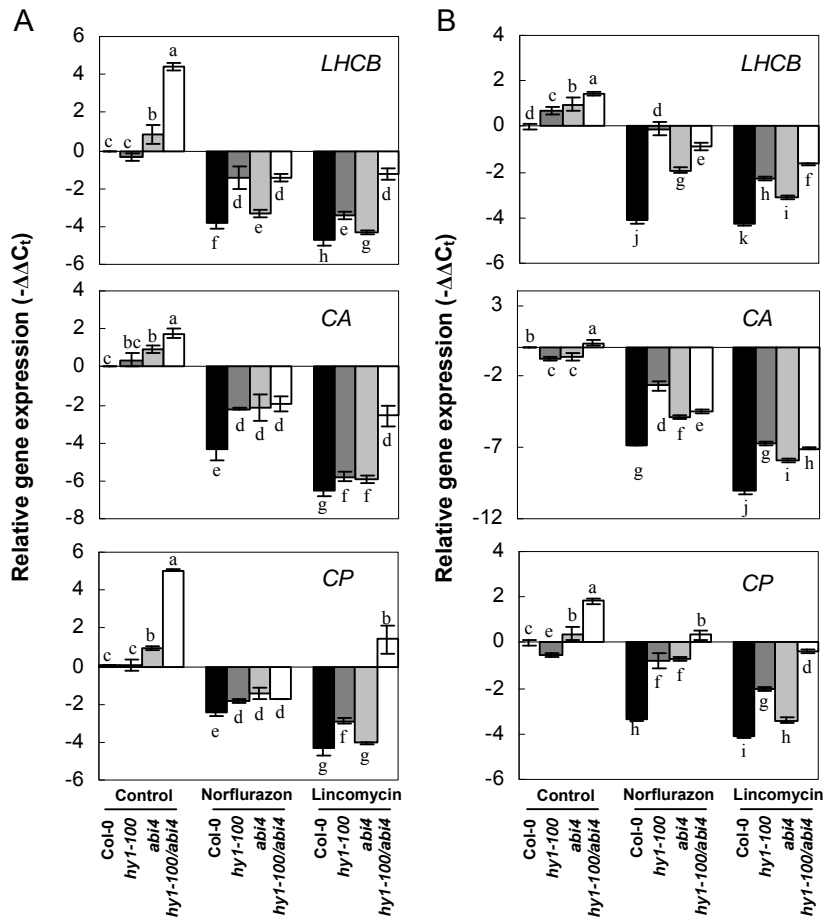

71

72 **Supplemental Figure S8.** Impact of norflurazon and lincomycin treatments on *LHCb*,

73 *CA*, and *CP* transcript levels in seedlings of [wild-type](#), *hy1-100*, *abi4*, and

74 *hy1-100/abi4*. A, Seeds were sown on MS medium with or without 5 μM norflurazon

75 or 500 μM lincomycin, and collected 5 days later for Q-PCR analysis. B, 5-day-old

76 seedlings were transferred to MS medium with or without 5 μM norflurazon or 500

77 μM lincomycin, and collected 5 days later for Q-PCR analysis. Seeds or seedlings

78 without chemical treatments were regarded as control. Expressions of selected genes

79 are presented relative to corresponding wild-type control samples. Values are mean ±

---

80 SE of at least three independent experiments. Differences among treatments were  
81 analyzed by one-way ANOVA, taking  $P < 0.05$  level as significant according to  
82 Tukey's multiple range test.

83 **Supplemental Figure S9**

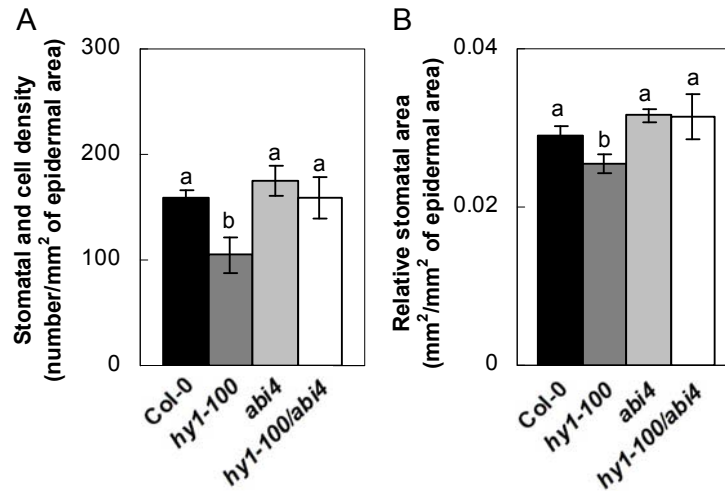

84 **Supplemental Figure S9.** Comparisons of stomatal and cell density (A) and relative  
85 stomatal area (B) in adaxial epiderm of the wild-type, *hy1-100*, *abi4*, and  
86 *hy1-100/abi4* mutants. 4-week-old plants were used ( $n = 50$ ). Data are means  $\pm$  SE  
87 from at least three independent experiments. Differences among treatments were  
88 analyzed by one-way ANOVA, taking  $P < 0.05$  level as significant according to  
89 Tukey's multiple range test ( $n = 50$ ).

90 **Supplemental Figure S10**

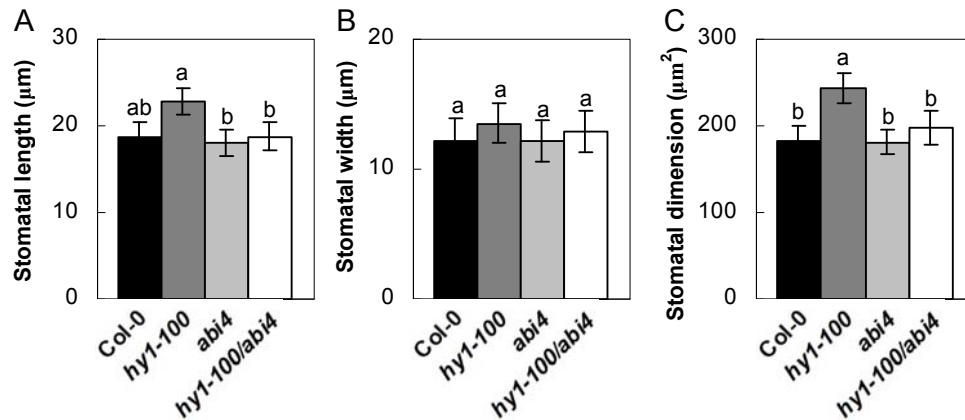

91 **Supplemental Figure S10.** Comparisons of stomatal length (A), stomatal width (B),  
92 and stomatal dimension (C) in adaxial epiderm of the wild-type, *hy1-100*, *abi4*, and  
93 *hy1-100/abi4* mutants. 4-week-old plants were used ( $n = 50$ ). Data are means  $\pm$  SE of  
94 100 stoma from 10 plants. Differences among treatments were analyzed by one-way  
95 ANOVA, taking  $P < 0.05$  level as significant according to Tukey's multiple range test.

96

97

---

98 **Supplemental Figure S11**

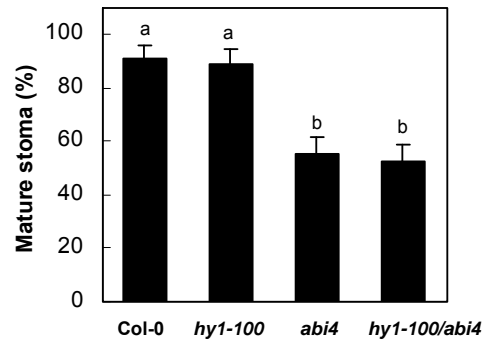

99 **Supplemental Figure S11.** Comparisons of percentage of mature stoma in leaves of  
100 the wild-type, *hy1-100*, *abi4*, and *hy1-100/abi4* mutants. 4-week-old plants were used.  
101 The ratio of ostiole length/stoma length higher than 1/3 was regarded as mature stoma.  
102 Data are means  $\pm$  SE of 100 stoma from 10 plants. Differences were analyzed by  
103 one-way ANOVA, taking  $P < 0.05$  level as significant according to Tukey's multiple  
104 range test.

105

106 **Supplemental Figure S12**

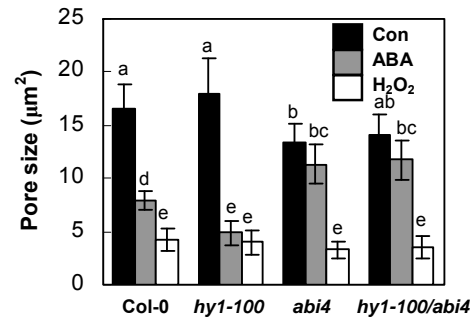

107 **Supplemental Figure S12.** Comparisons of stomal pore size in leaves of the  
108 wild-type, *hy1-100*, *abi4*, and *hy1-100/abi4* mutants. 4-week-old plants were used.  
109 Arabidopsis leaves of each ecotype were treated with ABA (10 µM) or H<sub>2</sub>O<sub>2</sub> (100 µM)  
110 in MES-KCl buffer for 2 hr. Data are means ± SE of 100 stoma from 10 plants.  
111 Differences among treatments were analyzed by one-way ANOVA, taking  $P < 0.05$   
112 level as significant according to Tukey's multiple range test.  
113



114 **Supplemental Figure S13.**

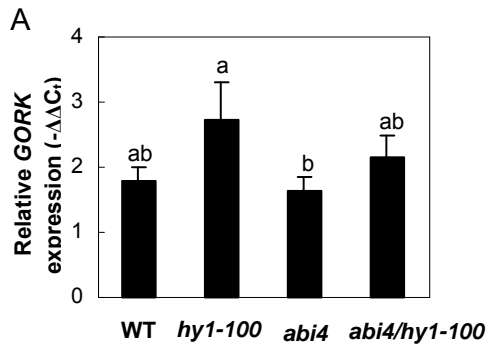

115 **Supplemental Figure S13.** ABA-induced *GORK* gene expression in 4-week-old  
116 wild-type, *hy1-100*, *abi4* and *abi4/hy1-100* mutant leaves. Relative *GORK* gene  
117 expression were measured 1 hr after ABA treatment (100  $\mu$ M), taking the expression  
118 level of each ecotype of the ABA-free control sample as 100%. Data are mean  $\pm$  SE  
119 from at least three independent experiments. Differences among treatments were  
120 analyzed by one-way ANOVA, taking  $P < 0.05$  level as significant according to  
121 Tukey's multiple range test.

122

123 **Supplemental Figure S14**

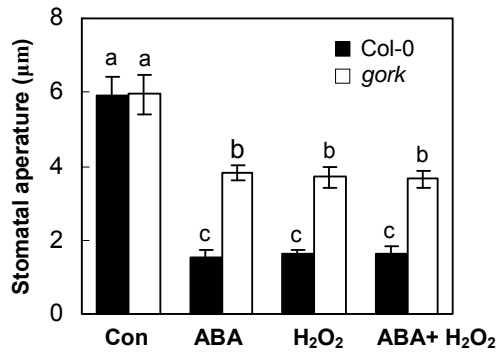

124

125 **Supplemental Figure S14.** Relative stomatal aperture of *gork* mutant plants in  
126 responses to ABA or H<sub>2</sub>O<sub>2</sub>. Epidermal fragments of wild-type (Col-0) or *gork* mutant  
127 plants were incubated in MES buffer in the presence of ABA (10 µM) or H<sub>2</sub>O<sub>2</sub> (50 µM)  
128 alone or their combinations for 2 hr. The control (Con) means a treatment with  
129 MES-KCl buffer only. Data are presented as means ± SE of 30 guard cells. Bars with  
130 different letters are significantly different at  $P < 0.05$  level according to Tukey's  
131 multiple comparison.

132

---

133 **MATERIALS AND METHODS**

134 **Analysis of noncovalently bound heme content**

135 Noncovalently bound heme was extracted as described (Weller et al., 1996). The  
136 heme concentration was measured by the heme ELISA kit according to the  
137 manufacturer's instructions (DongSongBo Industry Biotechnology Co., Ltd, Beijing,  
138 China).

139

140 **LITERATURE CITED**

141 **Weller JL, Terry MJ, Rameau C, Reid JB, Kendrick RE** (1996) The  
142 phytochrome-deficient *pcd1* mutant of pea is unable to convert heme to biliverdin IX $\alpha$ .  
143 *Plant Cell* 8: 55–67

144

145
